# Supplementary material
Source: PubMed Central journal article supplement (PMC3125872)
Supplement: pro0020-0880-SD1.pdf [file pro0020-0880-SD1.pdf]

# Supplementary material

## Towards prediction of functional protein pockets using blind docking and pocket search algorithms

Csaba Hetényi and David van der Spoel

### Contents

#### **Supplementary Table I.**

Performance of blind docking and pocket search using ligand-bound (holo) target conformations

#### **Supplementary Table II.**

Performance of blind docking and pocket search using primary-ligand-free (apo) target conformations

#### **Supplementary Table III.**

Influence of multiple ligands on blind docking

#### **Supplementary Table IV.**

Influence of hydrating water molecules on blind docking

**Supplementary Table I.** Performance of blind docking and pocket search using ligand-bound (holo) target conformations

| Complex Codes |        | AutoDock4 |      | EADock <sub>FF</sub> |      | EADock <sub>SF</sub> |      | SITEHOUND <sub>C</sub> |          | SITEHOUND <sub>OP</sub> |          | Q-SiteFinder |              | Pocket-Finder |              | PASS   |          |
|---------------|--------|-----------|------|----------------------|------|----------------------|------|------------------------|----------|-------------------------|----------|--------------|--------------|---------------|--------------|--------|----------|
| Protein       | Ligand | Rank#     | RMSD | Rank#                | RMSD | Rank#                | RMSD | Rank#                  | Distance | Rank#                   | Distance | Rank#        | Distance (Å) | Rank#         | Distance (Å) | Rank#  | Distance |
|               | (j)    | /Total    | (Å)  | /Total               | (Å)  | /Total               | (Å)  | /Total                 | (Å)      | /Total                  | (Å)      | /Total       | (Precision)  | /Total        | (Precision)  | /Total | (Å)      |
| 1b70          | 1      | 1/26      | 1.0  | 1/14                 | 0.6  | 1/13                 | 0.6  | 9/218                  | 0.8      | 2/263                   | 2.6      | 3/10         | 0.7(87)      | 5/10          | 17.9(0)      | 15/31  | 0.9      |
| 1cea          | 1      | 1/2       | 1.2  | 1/4                  | 1.1  | 1/4                  | 1.0  | 1/23                   | 0.6      | 2/27                    | 3.6      | 1/10         | 0.7(92)      | 7/7           | 3.1(62)      | 1/1    | 0.4      |
| 1dy4          | 1      | 1/22      | 1.1  | 5/10                 | 5.6  | 3/10                 | 5.4  | 4/80                   | 1.7      | 4/107                   | 2.2      | 1/10         | 1.7(26)      | 7/10          | 10.2(0)      | 7/11   | 3.5      |
|               | 2a     | 5/26      | 15.8 | 3/8                  | 15.2 | 8/9                  | 15.2 | 31/80                  | 5.2      | 10/107                  | 2.6      | 7/10         | 4.8(54)      | 9/10          | 10.8(0)      | 10/11  | 12.1     |
|               | 2b     | 22/26     | 16.2 | 4/8                  | 17.2 | 9/9                  | 17.2 | 53/80                  | 7.1      | 73/107                  | 2.2      | 6/10         | 16.6(0)      | 7/10          | 23.0(0)      | 4/11   | 14.5     |
| 1e7a          | 1a     | 1/12      | 1.4  | 1/14                 | 2.6  | 1/14                 | 2.6  | 4/137                  | 0.5      | 24/204                  | 2.4      | 2/10         | 1.3(69)      | 5/10          | 1.0(38)      | 7/23   | 0.6      |
|               | 1b     | 3/12      | 3.3  | 12/14                | 5.2  | 14/14                | 5.2  | 12/137                 | 2.2      | 17/204                  | 1.7      | 3/10         | 0.8(57)      | 9/10          | 20.8(0)      | 1/23   | 3.2      |
| 1eqg          | 1      | 1/10      | 1.0  | 2/9                  | 11.9 | 2/10                 | 11.7 | 5/112                  | 1.9      | 3/141                   | 1.0      | 3/10         | 1.6(87)      | 3/10          | 14.1(0)      | 1/16   | 3.2      |
|               | 2a     | 2/26      | 14.4 | 6/8                  | 31.6 | 5/8                  | 31.6 | 111/112                | 4.4      | 93/141                  | 3.8      | 7/10         | 11.8(0)      | 7/10          | 13.0(0)      | 16/16  | 12.8     |
|               | 2b     | 6/26      | 12.6 | 8/8                  | 18.0 | 7/8                  | 17.9 | 55/112                 | 3.0      | 18/141                  | 0.8      | 5/10         | 11.7(0)      | 4/10          | 11.8(0)      | 13/16  | 11.8     |
|               | 2c     | 2/26      | 16.1 | 6/8                  | 35.5 | 5/8                  | 35.5 | 53/112                 | 6.0      | 93/141                  | 5.0      | 7/10         | 10.6(0)      | 7/10          | 12.2(0)      | 15/16  | 11.8     |
|               | 2d     | 15/26     | 15.8 | 2/8                  | 24.1 | 1/8                  | 23.9 | 88/112                 | 2.9      | 27/141                  | 1.8      | 6/10         | 20.4(0)      | 3/10          | 19.5(0)      | 16/16  | 19.9     |
|               | 2e     | 21/26     | 14.1 | 2/8                  | 31.3 | 1/8                  | 31.2 | 44/112                 | 11.5     | 29/141                  | 8.7      | 6/10         | 23.8(0)      | 9/10          | 21.3(0)      | 16/16  | 29.8     |
|               | 3a     | 30/40     | 3.2  | 9/10                 | 18.6 | 9/12                 | 18.6 | 7/112                  | 2.1      | 80/141                  | 5.1      | 3/10         | 11.2(0)      | 6/10          | 14.3(0)      | 8/16   | 2.1      |
|               | 3b     | 3/40      | 15.6 | 2/10                 | 19.8 | 2/12                 | 19.8 | 98/112                 | 5.1      | 13/141                  | 5.6      | 7/10         | 18.5(0)      | 7/10          | 18.6(0)      | 6/16   | 13.7     |
|               | 4      | 2/30      | 1.4  | 9/17                 | 8.5  | 6/17                 | 8.5  | 2/112                  | 3.6      | 1/141                   | 3.7      | 2/10         | 3.0(86)      | 2/10          | 13.0(36)     | 3/16   | 5.2      |
| 1h61          | 1      | 3/10      | 1.0  | 4/14                 | 0.6  | 5/14                 | 0.6  | 1/68                   | 2.3      | 9/87                    | 3.8      | 5/10         | 5.5(0)       | 1/10          | 5.6(17)      | 2/8    | 4.6      |
|               | 2      | 1/53      | 1.5  | 3/10                 | 5.3  | 1/8                  | 4.4  | 3/68                   | 6.3      | 9/87                    | 3.6      | 1/10         | 2.3(36)      | 1/10          | 4.0(30)      | 1/8    | 2.9      |
| 1hvy          | 1      | 2/44      | 5.3  | 1/6                  | 3.5  | 1/6                  | 3.5  | 2/63                   | 2.9      | 1/73                    | 4.7      | 1/10         | 3.8(53)      | 1/10          | 4.6(25)      | 1/5    | 3.1      |
|               | 2      | 8/25      | 3.4  | 1/13                 | 4.0  | 2/12                 | 4.0  | 5/63                   | 3.7      | 1/73                    | 4.8      | 1/10         | 5.4(39)      | 1/10          | 4.8(14)      | 1/5    | 6.6      |
| 1hz4          | 1      | 1/2       | 28.0 | 7/12                 | 20.0 | 7/12                 | 20.0 | 24/80                  | 4.1      | 30/90                   | 2.2      | 10/10        | 0.9(88)      | 3/10          | 3.0(39)      | 4/7    | 10.1     |
|               | 2      | 19/34     | 5.1  | 7/10                 | 8.8  | 5/10                 | 8.8  | 5/80                   | 1.2      | 1/90                    | 2.1      | 1/10         | 0.7(44)      | 6/10          | 8.6(0)       | 3/7    | 1.7      |
| 1ivb          | 1      | 9/16      | 5.2  | 3/12                 | 2.4  | 1/12                 | 2.4  | 2/72                   | 0.5      | 3/90                    | 2.9      | 2/10         | 2.4(79)      | 2/10          | 1.4(53)      | 2/8    | 2.3      |
|               | 2      | 3/32      | 8.7  | 2/11                 | 13.0 | 1/11                 | 13.1 | 8/72                   | 8.7      | 58/90                   | 2.6      | 9/10         | 8.0(0)       | 1/10          | 13.8(0)      | 3/8    | 9.4      |
| 1ju4          | 1      | 3/7       | 3.0  | 3/10                 | 20.7 | 7/11                 | 18.9 | 21/104                 | 1.6      | 2/181                   | 1.6      | 2/10         | 1.6(67)      | 9/10          | 13.6(0)      | 1/7    | 5.7      |
| 1lna          | 1      | 10/17     | 2.8  | 3/8                  | 1.3  | 2/10                 | 3.1  | 1/59                   | 2.4      | 48/79                   | 4.4      | 1/10         | 5.4(39)      | 1/10          | 3.5(39)      | 2/5    | 3.4      |
| 1m2z          | 1      | 1/4       | 0.4  | 1/14                 | 0.3  | 1/13                 | 0.3  | 1/62                   | 0.3      | 3/70                    | 3.3      | 1/10         | 0.2(85)      | 1/10          | 0.5(56)      | 1/6    | 1.1      |
|               | 2a     | 11/14     | 15.1 | 6/6                  | 16.1 | 6/6                  | 16.1 | 20/62                  | 4.4      | 38/70                   | 3.6      | 4/10         | 14.1(0)      | 3/10          | 14.6(0)      | 4/6    | 14.6     |
|               | 2b     | 13/14     | 15.4 | 6/6                  | 14.8 | 6/6                  | 14.8 | 20/62                  | 7.5      | 38/70                   | 7.2      | 4/10         | 14.3(0)      | 8/10          | 15.6(0)      | 4/6    | 14.8     |
|               | 2c     | 13/14     | 2.2  | 6/6                  | 4.5  | 6/6                  | 4.5  | 8/62                   | 2.2      | 47/70                   | 2.8      | 4/10         | 2.9(54)      | 6/10          | 4.0(50)      | 4/6    | 2.6      |
| 1ngp          | 1      | 1/11      | 1.0  | 8/20                 | 4.8  | 1/21                 | 4.2  | 8/89                   | 3.2      | 1/162                   | 0.4      | 2/10         | 1.4(95)      | 5/10          | 1.8(52)      | 6/6    | 1.5      |
| 1pth          | 1      | 5/9       | 17.0 | 4/12                 | 16.0 | 9/12                 | 15.9 | 20/111                 | 2.1      | 5/145                   | 1.9      | 2/10         | 5.0(22)      | 10/10         | 11.9(0)      | 11/17  | 3.1      |
|               | 2a     | 3/30      | 8.9  | 3/10                 | 13.6 | 2/9                  | 13.6 | 72/111                 | 7.8      | 13/145                  | 4.1      | 5/10         | 12.0(0)      | 5/10          | 12.9(0)      | 2/17   | 12.8     |
|               | 2b     | 21/30     | 16.3 | 7/10                 | 15.2 | 4/9                  | 15.2 | 89/111                 | 5.9      | 34/145                  | 2.8      | 7/10         | 20.9(0)      | 3/10          | 18.5(0)      | 10/17  | 17.7     |
|               | 2c     | 24/30     | 20.1 | 7/10                 | 15.0 | 4/9                  | 15.0 | 96/111                 | 6.4      | 34/145                  | 7.0      | 7/10         | 25.5(0)      | 3/10          | 19.5(0)      | 10/17  | 18.2     |
|               | 2d     | 4/30      | 11.3 | 2/10                 | 18.4 | 8/9                  | 18.4 | 70/111                 | 4.8      | 14/145                  | 2.2      | 4/10         | 11.3(0)      | 4/10          | 11.0(0)      | 12/17  | 10.6     |
|               | 3      | 20/38     | 3.8  | 16/18                | 12.7 | 13/19                | 12.7 | 2/111                  | 2.0      | 98/145                  | 4.5      | 10/10        | 4.0(45)      | 6/10          | 14.2(0)      | 2/17   | 1.9      |
|               | 4      | 1/44      | 7.0  | 11/21                | 8.5  | 9/21                 | 8.8  | 17/111                 | 4.4      | 82/145                  | 5.2      | 3/10         | 8.0(83)      | 2/10          | 6.1(39)      | 6/17   | 6.0      |
| 3pcn          | 1      | 3/11      | 4.6  | 5/17                 | 5.1  | 3/16                 | 1.8  | 26/65                  | 7.5      | 80/109                  | 4.1      | 1/10         | 1.8(68)      | 2/10          | 2.3(33)      | 1/9    | 1.5      |
| 3tpi          | 1      | 1/21      | 0.9  | 1/10                 | 2.6  | 1/10                 | 2.6  | 1/53                   | 1.2      | 58/70                   | 4.0      | 1/10         | 0.8(70)      | 1/10          | 1.9(34)      | 1/4    | 2.5      |

Notes to Supplementary Table I.

Rank #: serial number of the rank. Total: total number of ranks found. RMSD/Distance: the Root Mean Squared Deviation/distance between the docked and the crystallographic (measured) ligand structures/centers of ligand structures. Lists of all ranks can be found in a compressed file attached as Supplementary material.

**Supplementary Table II.** Performance of blind docking and pocket search using primary ligand-free (apo) target conformations

| Complex Codes |            | AutoDock4    |          | EADock <sub>FF</sub> |          | EADock <sub>SF</sub> |          | SITEHOUND <sub>C</sub> |              | SITEHOUND <sub>OP</sub> |              | Q-SiteFinder |                          | Pocket-Finder |                          | PASS         |              |
|---------------|------------|--------------|----------|----------------------|----------|----------------------|----------|------------------------|--------------|-------------------------|--------------|--------------|--------------------------|---------------|--------------------------|--------------|--------------|
| Protein       | Ligand (j) | Rank# /Total | RMSD (Å) | Rank# /Total         | RMSD (Å) | Rank# /Total         | RMSD (Å) | Rank# /Total           | Distance (Å) | Rank# /Total            | Distance (Å) | Rank# /Total | Distance (Å) (Precision) | Rank# /Total  | Distance (Å) (Precision) | Rank# /Total | Distance (Å) |
| 1b70          | 1          | 3/24         | 0.7      | 3/20                 | 4.3      | 1/21                 | 1.6      | 1/214                  | 3.1          | 5/260                   | 1.0          | 2/10         | 1.0(87)                  | 8/10          | 17.3(0)                  | 6/24         | 1.2          |
| 1cea          | 1          | 1/3          | 2.1      | 1/13                 | 2.8      | 1/13                 | 2.2      | 1/21                   | 1.6          | 18/26                   | 3.8          | 1/10         | 0.7(83)                  | 5/10          | 2.7(58)                  | 1/1          | 0.7          |
| 1dy4          | 1          | 4/29         | 3.5      | 5/12                 | 5.6      | 5/12                 | 5.6      | 3/83                   | 0.8          | 11/101                  | 3.6          | 1/10         | 1.0(49)                  | 6/10          | 10.5(0)                  | 1/10         | 6.8          |
| 1e7a          | 1a         | 1/15         | 12.8     | 12/12                | 12.4     | 9/12                 | 12.4     | 26/134                 | 2.2          | 24/143                  | 1.0          | 6/10         | 1.6(68)                  | 3/10          | 1.2(49)                  | 14/21        | 2.8          |
|               | 1b         | 3/15         | 5.9      | 3/12                 | 11.6     | 7/12                 | 12.2     | 5/134                  | 7.2          | 103/143                 | 1.7          | 10/10        | 5.0(11)                  | 8/10          | 4.0(18)                  | 7/21         | 4.7          |
| 1eqg          | 1          | 4/9          | 2.4      | 2/13                 | 12.0     | 3/14                 | 11.9     | 6/110                  | 1.6          | 1/145                   | 1.6          | 3/10         | 1.6(81)                  | 3/10          | 15.0(0)                  | 2/13         | 2.3          |
| 1h61          | 1          | 3/9          | 7.7      | 1/18                 | 4.7      | 2/18                 | 4.5      | 1/64                   | 7.0          | 2/84                    | 3.8          | 8/10         | 7.3(0)                   | 1/10          | 6.2(16)                  | 4/5          | 2.8          |
| 1hvy          | 1          | 4/37         | 4.6      | 16/24                | 4.2      | 9/24                 | 4.2      | 26/59                  | 4.7          | 30/72                   | 6.1          | 2/10         | 7.4(19)                  | 1/10          | 8.4(3)                   | 1/5          | 6.0          |
| 1ju4          | 1          | 5/9          | 3.3      | 2/19                 | 20.7     | 2/19                 | 20.6     | 50/104                 | 2.0          | 19/122                  | 2.6          | 3/10         | 2.7(51)                  | 1/10          | 2.6(18)                  | 2/11         | 5.7          |
| 1lna          | 1          | 11/11        | 7.5      | 3/13                 | 1.9      | 9/14                 | 4.0      | 1/63                   | 2.1          | 10/72                   | 3.5          | 1/10         | 3.4(62)                  | 1/10          | 3.8(32)                  | 1/5          | 45.2         |
| 1ngp          | 1          | 1/12         | 4.6      | 1/14                 | 0.9      | 3/15                 | 5.0      | 7/85                   | 1.9          | 1/115                   | 1.5          | 2/10         | 1.0(91)                  | 4/10          | 2.3(46)                  | 6/7          | 1.8          |
| 1pth          | 1          | 5/11         | 16.7     | 6/20                 | 12.0     | 11/21                | 9.1      | 6/110                  | 2.7          | 1/141                   | 2.6          | 3/10         | 2.8(42)                  | 3/10          | 15.7(0)                  | 2/11         | 3.4          |
| 3pcn          | 1          | 1/7          | 2.7      | 11/18                | 4.6      | 10/18                | 4.6      | 10/88                  | 5.2          | 1/101                   | 4.1          | 4/10         | 4.6(36)                  | 2/10          | 3.4(27)                  | 1/14         | 7.3          |

Notes to Supplementary Table II.

Rank #: serial number of the rank. Total: total number of ranks found. RMSD/Distance: the Root Mean Squared Deviation/distance between the docked and the crystallographic (measured) ligand structures/centers of ligand structures. Lists of all ranks can be found in a compressed file attached as Supplementary material.

### Supplementary Table III. Influence of multiple ligands on blind docking

| Protein          | Reference ligand (j) | Interfering pocket (n≠j) | Rank # of docked reference ligand L <sub>j</sub><br>(Distance between L <sub>j</sub> and L <sub>n</sub> , Å) |
|------------------|----------------------|--------------------------|--------------------------------------------------------------------------------------------------------------|
| <b>AutoDock4</b> |                      |                          |                                                                                                              |
| 1dy4             | 1                    | 2                        | 17(3.2)                                                                                                      |
|                  | 2                    | 1                        | 1(4.8) 2(2.4) 13(3.7) 15(4.1)                                                                                |
| 1e7a             | 1                    | 2                        | 3(2.3) 9(1.6)                                                                                                |
| 1eqg             | 1                    | 4                        | 8(4.8)                                                                                                       |
|                  | 2                    | 1                        | 20(3.4)                                                                                                      |
|                  | 2                    | 4                        | 4(4.4)                                                                                                       |
|                  | 3                    | 2b                       | 33(3.4)                                                                                                      |
|                  | 3                    | 4                        | 8(4.1) 9(4.2) 13(4.0) 20(4.0)                                                                                |
| 1h61             | 1                    | 2                        | 11(4.7) 12(4.6)                                                                                              |
|                  | 2                    | 1                        | 1(0.7) 2(1.9) 4(4.9)                                                                                         |
| 1hvy             | 1                    | 2                        | 6(2.6) 11(1.0) 15(3.0) 30(3.3)                                                                               |
| 1hz4             | 1                    | 2                        | 4(4.6) 5(2.3) 17(4.7)                                                                                        |
| 1m2z             | 1                    | 2c                       | 1(2.5)                                                                                                       |
|                  | 2                    | 1                        | 2(1.2)                                                                                                       |
| 1pth             | 2                    | 1                        | 1(2.8) 2(1.9) 4(2.0) 6(0.5)                                                                                  |
|                  | 3                    | 4                        | 15(4.0) 18(3.1)                                                                                              |
|                  | 4                    | 3                        | 10(3.9) 12(3.9)                                                                                              |
|                  |                      |                          | 9(4.7) 15(5.0) 29(4.8)                                                                                       |
| <b>EADock</b>    |                      |                          |                                                                                                              |
| 1dy4             | 2                    | 1                        | 8(2.2)                                                                                                       |
| 1eqg             | 1                    | 3a                       | 2(4.2) 5(4.7)                                                                                                |
|                  | 1                    | 4                        | 1(2.1)                                                                                                       |
|                  | 2                    | 3a                       | 6(2.2)                                                                                                       |
|                  | 2                    | 4                        | 2(3.8) 3(3.5) 7(2.2)                                                                                         |
|                  | 3                    | 4                        | 1(2.0) 3(3.4) 4(3.1) 5(3.4) 6(2.2) 7(1.7)                                                                    |
| 1h61             | 1                    | 2                        | 1(3.2) 2(3.2)                                                                                                |
|                  | 2                    | 1                        | 1(0.7) 2(2.5) 5(1.7) 6(3.2) 7(4.3) 8(2.8) 10(4.3)                                                            |
| 1hvy             | 2                    | 1                        | 11(2.2) 13(3.3)                                                                                              |
| 1ivb             | 2                    | 1                        | 11(2.9)                                                                                                      |
| 1m2z             | 2                    | 1                        | 1(0.5) 2(0.3)                                                                                                |
| 1pth             | 2                    | 4                        | 2(4.6)                                                                                                       |
|                  | 3                    | 4                        | 1(2.2) 7(3.0) 10(2.8) 15(2.8)                                                                                |

Notes to Supplementary Table III.

Lists of all ranks can be found in a compressed file attached as Supplementary material.

**Supplementary Table IV.** Influence of hydrating water molecules on blind docking

| Protein                    | Reference ligand (j) | Interfering water molecules |                                                    |                                      |                                     | Total Count |
|----------------------------|----------------------|-----------------------------|----------------------------------------------------|--------------------------------------|-------------------------------------|-------------|
|                            |                      | inside the pocket (Type 1)  |                                                    | at the bottom of the pocket (Type 2) |                                     |             |
|                            |                      | Count                       | Rank # of Pocket (Count)                           | Count                                | Rank # of Pocket (Count)            |             |
| <b>AutoDock4</b>           |                      |                             |                                                    |                                      |                                     |             |
| 1b70                       | 1                    | 16                          | 2(2) 3(1) 4(1) 5(1) 8(1) 9(1)                      | 5                                    | 2(1) 6(1) 7(1) 9(1)                 | 21          |
| 1cea                       | 1                    | 2                           | 2(2)                                               | 0                                    |                                     | 2           |
| 1dy4                       | 1                    | 51                          | 2(7) 5(2) 6(2) 8(3) 9(2) 10(1)                     | 6                                    | 2(1) 8(2)                           | 57          |
|                            | 2                    | 60                          | 3(3) 4(4) 5(1) 6(2) 7(1) 8(6) 9(2) 10(3)           | 15                                   | 5(1) 7(2) 8(2) 9(2)                 | 75          |
| 1e7a                       | 1                    | 4                           | 2(1) 6(2) 7(1)                                     | 3                                    | 5(2) 10(1)                          | 7           |
| 1eqg                       | 1                    | 12                          | 2(3) 3(1) 4(1) 5(1) 6(1) 7(2) 9(2) 10(1)           | 0                                    |                                     | 12          |
|                            | 2                    | 22                          | 1(1) 2(2) 5(1) 6(1) 8(1) 9(1) 10(1)                | 7                                    | 1(1) 7(1)                           | 29          |
|                            | 3                    | 36                          | 1(1) 3(1) 6(1) 7(2) 10(2)                          | 4                                    | 10(1)                               | 40          |
|                            | 4                    | 24                          | 5(1) 9(3) 10(1)                                    | 7                                    | 1(1) 9(1)                           | 31          |
| 1h61                       | 1                    | 52                          | 2(3) 3(1) 5(4) 6(4) 7(14) 8(10) 9(6) 10(10)        | 10                                   | 2(1) 3(1) 5(2) 7(1) 9(1) 10(4)      | 62          |
|                            | 2                    | 170                         | 1(1) 2(1) 3(1) 4(4) 6(1) 7(1) 8(3) 9(4) 10(1)      | 24                                   | 1(1) 2(1) 9(1)                      | 194         |
| 1hvy                       | 1                    | 65                          | 1(4) 2(1) 3(2) 4(2) 6(2) 7(2) 10(2)                | 14                                   | 4(1) 5(1) 9(1)                      | 79          |
|                            | 2                    | 49                          | 1(1) 2(2) 3(2) 4(5) 6(3) 7(6) 8(1) 9(2) 10(1)      | 10                                   | 1(1) 2(1) 3(1) 8(1) 10(1)           | 59          |
| 1hz4                       | 1                    | 3                           | 2(3)                                               | 6                                    | 1(3) 2(3)                           | 9           |
|                            | 2                    | 95                          | 1(3) 2(2) 3(4) 4(3) 5(1) 6(3) 7(2) 8(4) 9(4) 10(5) | 20                                   | 2(1) 3(1) 4(2) 5(1) 6(2) 8(1) 10(1) | 115         |
| 1ju4                       | 1                    | 17                          | 1(5) 2(5) 4(1) 5(3) 7(3)                           | 5                                    | 2(2) 4(1) 5(1) 7(1)                 | 22          |
| 1lna                       | 1                    | 33                          | 1(2) 2(1) 3(3) 4(4) 5(3) 6(2) 7(1) 8(2) 9(2)       | 1                                    | 1(1)                                | 34          |
| 1m2z                       | 1                    | 6                           | 2(2) 3(2) 4(2)                                     | 2                                    | 4(2)                                | 8           |
|                            | 2                    | 16                          | 3(2) 5(4) 7(2) 10(2)                               | 0                                    |                                     | 16          |
| 1ngp                       | 1                    | 13                          | 1(1) 2(1) 3(3) 4(1) 6(3) 7(1) 8(1) 9(1)            | 3                                    | 3(2) 6(1)                           | 16          |
| 3pcn                       | 1                    | 12                          | 1(1) 3(2) 5(2) 6(2) 7(2) 10(3)                     | 11                                   | 3(3) 5(2) 6(1) 7(1) 8(2) 9(1) 10(1) | 23          |
| 3tpi                       | 1                    | 32                          | 3(2) 4(5) 5(4) 6(2) 8(3) 9(3) 10(3)                | 11                                   | 1(1) 2(2) 8(2) 10(2)                | 43          |
| <b>EADock<sub>FF</sub></b> |                      |                             |                                                    |                                      |                                     |             |
| 1b70                       | 1                    | 12                          | 2(1) 3(1) 4(3) 5(1) 7(2) 8(1) 9(1) 10(1)           | 2                                    | 4(1) 9(1)                           | 14          |
| 1dy4                       | 1                    | 21                          | 1(2) 2(2) 3(3) 4(2) 6(3) 8(2) 9(5) 10(2)           | 6                                    | 3(2) 6(2) 9(2)                      | 27          |
|                            | 2                    | 12                          | 1(2) 2(2) 3(2) 4(2) 5(1) 6(2) 7(1)                 | 7                                    | 2(1) 5(4) 7(2)                      | 19          |
| 1eqg                       | 1                    | 3                           | 9(3)                                               | 2                                    | 7(2)                                | 5           |
|                            | 3                    | 2                           | 2(2)                                               | 4                                    | 2(3) 6(1)                           | 6           |
|                            | 4                    | 4                           | 1(1) 3(1) 5(1)                                     | 1                                    | 4(1)                                | 5           |
| 1h61                       | 1                    | 39                          | 1(1) 2(2) 5(2) 6(2) 7(6) 8(2) 9(2) 10(5)           | 10                                   | 7(2) 9(1) 10(3)                     | 48          |
|                            | 2                    | 26                          | 2(1) 4(7) 5(2) 6(4) 7(1) 8(2) 9(8) 10(1)           | 15                                   | 3(1) 4(6) 5(1) 6(2) 8(2) 9(2) 10(1) | 41          |
| 1hvy                       | 1                    | 10                          | 1(2) 2(3) 4(1) 5(1) 6(3)                           | 3                                    | 2(1) 3(1) 5(1)                      | 13          |
|                            | 2                    | 24                          | 2(5) 3(2) 4(3) 5(5) 8(2) 9(1) 10(2)                | 7                                    | 5(1) 8(2) 10(2)                     | 31          |
| 1hz4                       | 1                    | 29                          | 1(2) 2(3) 3(2) 4(3) 5(5) 6(1) 8(2) 10(3)           | 11                                   | 2(2) 3(2) 4(4) 8(1) 9(1) 10(1)      | 40          |
|                            | 2                    | 26                          | 1(3) 2(4) 3(4) 4(2) 5(3) 6(4) 7(3) 8(2) 10(1)      | 8                                    | 2(3) 3(3) 4(1) 8(1)                 | 34          |
| 1ju4                       | 1                    | 18                          | 1(2) 2(3) 3(2) 4(1) 5(2) 6(3) 7(2) 8(1) 9(2)       | 5                                    | 5(1) 6(1) 7(2) 10(1)                | 23          |
| 1lna                       | 1                    | 8                           | 1(1) 2(1) 4(1) 5(3) 6(1) 7(1)                      | 3                                    | 1(2) 5(1)                           | 11          |
| 1m2z                       | 1                    | 4                           | 9(1) 10(2)                                         | 0                                    |                                     | 4           |
|                            | 2                    | 1                           | 6(1)                                               | 1                                    | 6(1)                                | 2           |
| 3pcn                       | 1                    | 8                           | 2(1) 3(3) 8(1)                                     | 8                                    | 2(3) 7(2)                           | 16          |
| 3tpi                       | 1                    | 21                          | 1(1) 2(1) 3(1) 4(4) 5(4) 6(4) 7(3) 9(1) 10(2)      | 7                                    | 1(1) 2(2) 3(2) 8(2)                 | 28          |

Notes to Supplementary Table IV.

The first 10 ranks are tabulated in detail. Lists of all ranks can be found in a compressed file attached as Supplementary material.
